# Supplementary material
Source: PubMed Central journal article supplement (PMC4490560)
Supplement: ncomms8375-s1.pdf [file ncomms8375-s1.pdf]

# SUPPLEMENTARY INFORMATION

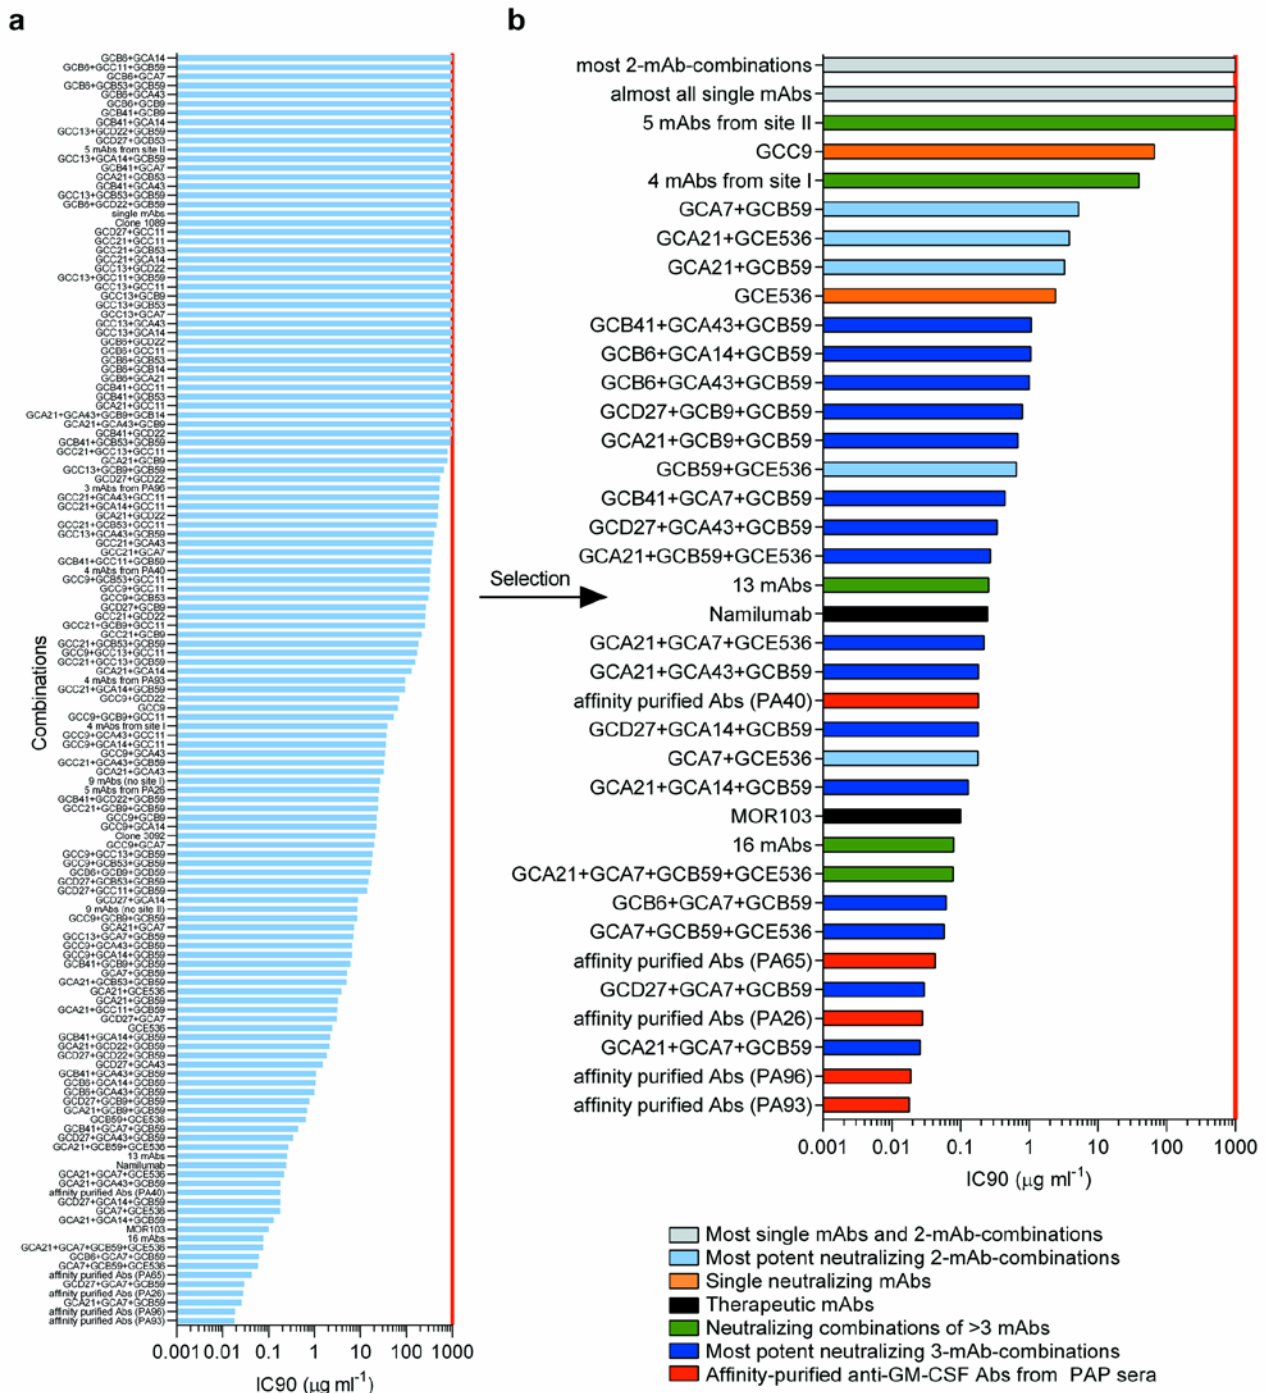

**Supplementary Figure 1. *In vitro* neutralization of GM-CSF by single or multiple antibodies.**

**(a)** Rank of neutralizing activity (IC90 values) of 140 different combinations of GM-CSF mAbs. **(b)**

A selection of the most potent neutralizing combinations is shown and compared to therapeutic anti-GM-CSF antibodies (MOR103 and Namilumab) and to autoantibodies purified from PAP sera.

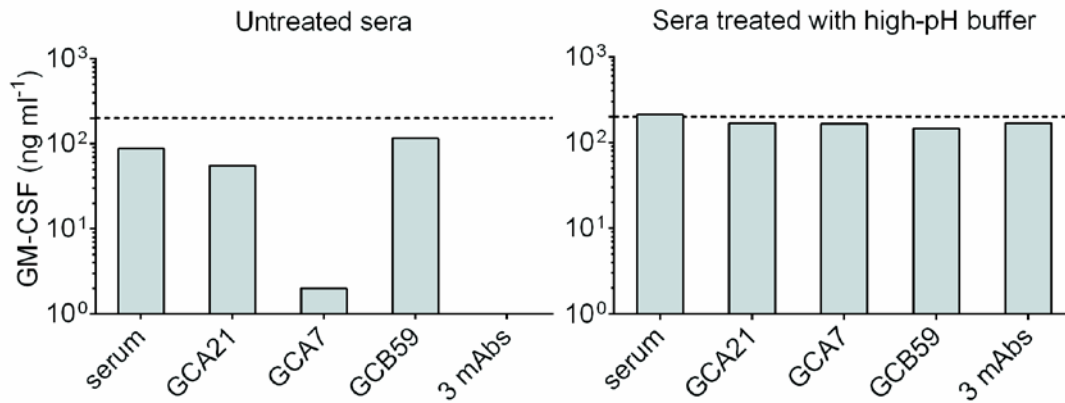

**Supplementary Figure 2. A sandwich ELISA to detect GM-CSF in the presence of specific antibodies.** A fixed amount of GM-CSF was added to mouse serum together with three monoclonal antibodies (GCA21, GCA7, GCB59) added separately or in combination. The quantification of GM-CSF was performed by a sandwich ELISA using an antibody specific for site II for capture and site I for detection. Serial dilutions of serum in neutral (left) or alkaline buffer (right) were added and GM-CSF concentration was determined with reference to a GM-CSF standard. The dotted line represents the concentration of GM-CSF measured in the absence of antibodies.

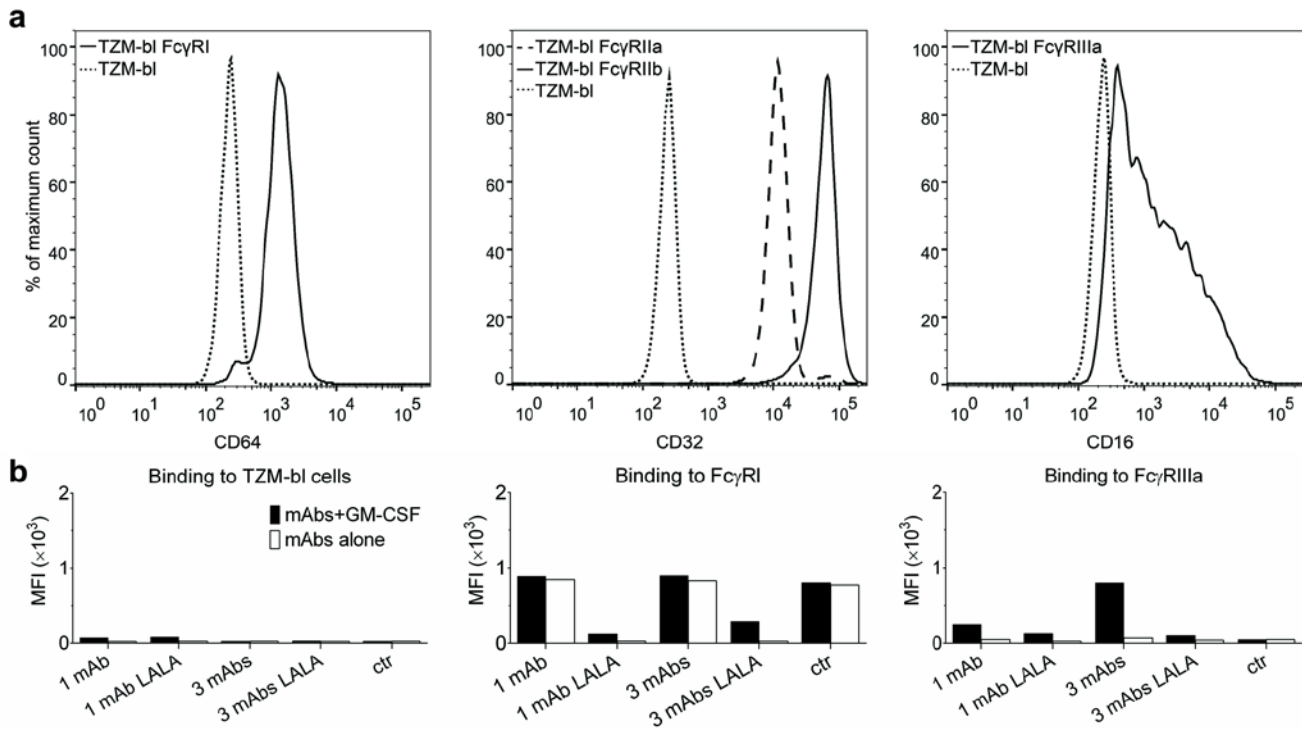

**Supplementary Figure 3. Binding of immune complexes to TzM-bl cells expressing different FcγRs.** (a) Expression of FcγRs on TzM-bl cells transfected with FcγRI, FcγRIIa/b and FcγRIIIa, as detected by antibodies to CD64, CD32 and CD16, respectively. Untransfected TzM-bl cells were used as negative control. (b) Shown is also the binding of GM-CSF immune complexes containing one or three antibodies to TzM-bl cells expressing FcγRI or FcγRIIIa or to untransfected TzM-bl cells.

**Supplementary Table 1**  
Features of 5 PAP patients

| <b>ID</b> | <b>Code</b> | <b>Gender</b> | <b>Birth year</b> | <b>Diagnosis year</b> | <b>Therapy</b> | <b>Follow up (years)</b> | <b>DSS</b> | <b>Serum GM-CSF abs (<math>\mu\text{g ml}^{-1}</math>)</b> |
|-----------|-------------|---------------|-------------------|-----------------------|----------------|--------------------------|------------|------------------------------------------------------------|
| PA93      | GCA         | M             | 1943              | 2010                  | -              | 2                        | 3          | 804.5                                                      |
| PA26      | GCB         | F             | 1966              | 2005                  | -              | 7                        | 3          | 454.9                                                      |
| PA40      | GCC         | F             | 1954              | 2005                  | WLL            | 7                        | 1          | 100.6                                                      |
| PA96      | GCD         | M             | 1980              | 2010                  | -              | 2                        | 1          | 741.2                                                      |
| PA65      | GCE         | F             | 1959              | 2005                  | WLL            | 7                        | 1          | 46.0                                                       |

WLL = whole lung lavage; DSS = Disease Severity Score calculated at the time of sample collection; abs = antibodies

**Supplementary Table 2**

Somatic mutations in the V segment critically contribute to the specificity of GM-CSF autoantibodies

| <b>mAb</b>    | <b>Version</b>        | <b>EC50 (ng ml<sup>-1</sup>)</b> | <b>Ka (M s<sup>-1</sup>)</b> | <b>Kd (s<sup>-1</sup>)</b> | <b>KD (M)</b> |
|---------------|-----------------------|----------------------------------|------------------------------|----------------------------|---------------|
| <b>GCA21</b>  | <i>WT</i>             | 33.3                             | 1.3E+06                      | 5.5E-04                    | 5.7E-10       |
|               | <i>VK UCA</i>         | 77.3                             | 3.1E+06                      | 2.6E-02                    | 1.1E-08       |
|               | <i>VH UCA</i>         | nc                               | nc                           | nc                         | nc            |
|               | <i>UCA</i>            | nc                               | nc                           | nc                         | nc            |
|               | <i>UCA - HCDR3 WT</i> | nc                               | nc                           | nc                         | nc            |
| <b>GCA7</b>   | <i>WT</i>             | 52.4                             | 1.8E+05                      | 3.1E-05                    | 2.3E-10       |
|               | <i>VK UCA</i>         | 64.8                             | 4.9E+04                      | 1.7E-05                    | 3.5E-10       |
|               | <i>VH UCA</i>         | nc                               | nc                           | nc                         | nc            |
|               | <i>UCA</i>            | 7724                             | nc                           | nc                         | nc            |
|               | <i>UCA - HCDR3 WT</i> | 354.2                            | 3.4E+04                      | 2.1E-03                    | 6.3E-08       |
| <b>GCB59</b>  | <i>WT</i>             | 428.7                            | 1.0E+06                      | 1.7E-03                    | 1.8E-09       |
|               | <i>VL UCA</i>         | 24039                            | 1.3E+06                      | 1.0E-02                    | 8.4E-09       |
|               | <i>VH UCA</i>         | nc                               | nc                           | nc                         | nc            |
|               | <i>UCA</i>            | nc                               | nc                           | nc                         | nc            |
|               | <i>UCA - HCDR3 WT</i> | nc                               | nc                           | nc                         | nc            |
| <b>GCB9</b>   | <i>WT</i>             | 322                              | 3.1E+05                      | 7.5E-04                    | 2.5E-09       |
|               | <i>VK UCA</i>         | 258.3                            | 4.8E+05                      | 2.8E-03                    | 6.2E-09       |
|               | <i>VH UCA</i>         | 956                              | 4.2E+05                      | 3.9E-03                    | 1.5E-08       |
|               | <i>UCA</i>            | 6765                             | 1.7E+05                      | 1.2E-02                    | 8.2E-08       |
|               | <i>UCA - HCDR3 WT</i> | 3664                             | 5.9E+04                      | 8.5E-03                    | 1.5E-07       |
| <b>GCA43</b>  | <i>WT</i>             | 258                              | 2.5E+05                      | 1.5E-04                    | 6.2E-10       |
|               | <i>VK UCA</i>         | 286.7                            | 3.0E+05                      | 1.7E-04                    | 6.5E-10       |
|               | <i>VH UCA</i>         | nc                               | nc                           | nc                         | nc            |
|               | <i>UCA</i>            | nc                               | nc                           | nc                         | nc            |
|               | <i>UCA - HCDR3 WT</i> | nc                               | nc                           | nc                         | nc            |
| <b>GCB6</b>   | <i>WT</i>             | 31.1                             | 5.2E+05                      | 4.4E-04                    | 1.0E-09       |
|               | <i>VK UCA</i>         | 35.1                             | 6.5E+05                      | 1.0E-02                    | 1.9E-08       |
|               | <i>VH UCA</i>         | nc                               | nc                           | nc                         | nc            |
|               | <i>UCA</i>            | nc                               | nc                           | nc                         | nc            |
|               | <i>UCA - HCDR3 WT</i> | nc                               | nc                           | nc                         | nc            |
| <b>GCE536</b> | <i>WT</i>             | 54.3                             | 5.8E+05                      | 1.4E-04                    | 2.5E-10       |
|               | <i>VK UCA</i>         | 37.5                             | 7.3E+05                      | 9.5E-04                    | 1.3E-09       |
|               | <i>VH UCA</i>         | 56.3                             | 4.7E+04                      | 5.4E-05                    | 1.1E-09       |
|               | <i>UCA</i>            | 19773                            | 2.4E+03                      | 8.7E-05                    | 9.0E-08       |
|               | <i>UCA - HCDR3 WT</i> | 13.7                             | 5.5E+05                      | 6.0E-03                    | 1.0E-08       |

Binding of WT, UCA, UCA-HCDR3 WT and shuffled variants VK/VL UCA and VH UCA to GM-CSF as measured by ELISA and SPR. nc = not calculable
